# Supplementary material for: Impact of homologous recombination deficiency on CDK4/6 inhibitor sensitivity in HR+/HER2-breast cancer
Source: Research Square preprint supplement (doi:10.21203/rs.3.rs-7253927/v1), 2025-08-13
Supplement: Supplementary file 1 [file 0fe48941e09035bf8f6e4ef8.docx]

# Impact of homologous recombination deficiency on CDK4/6 inhibitor sensitivity in HR+/HER2- breast cancer

Daniela Haas1, Selina Wolf1, Urte Stankute1, Ethan S. Sokol2, Meagan Montesion2,Magdalena Kröll1, SteffiOesterreich3,4,5, Adrian V. Lee3,4,5, Charles E. Geyer Jr.5,Philipp J. Jost1,6, Nadia Dandachi1, Michael A. Dengler1,#,*,Marija Balic1,3,5,#,*

# **Supplemental information:**

**Supplementary Figures**

Fig. S1-S5

**Supplementary Methods**

Material and Methods


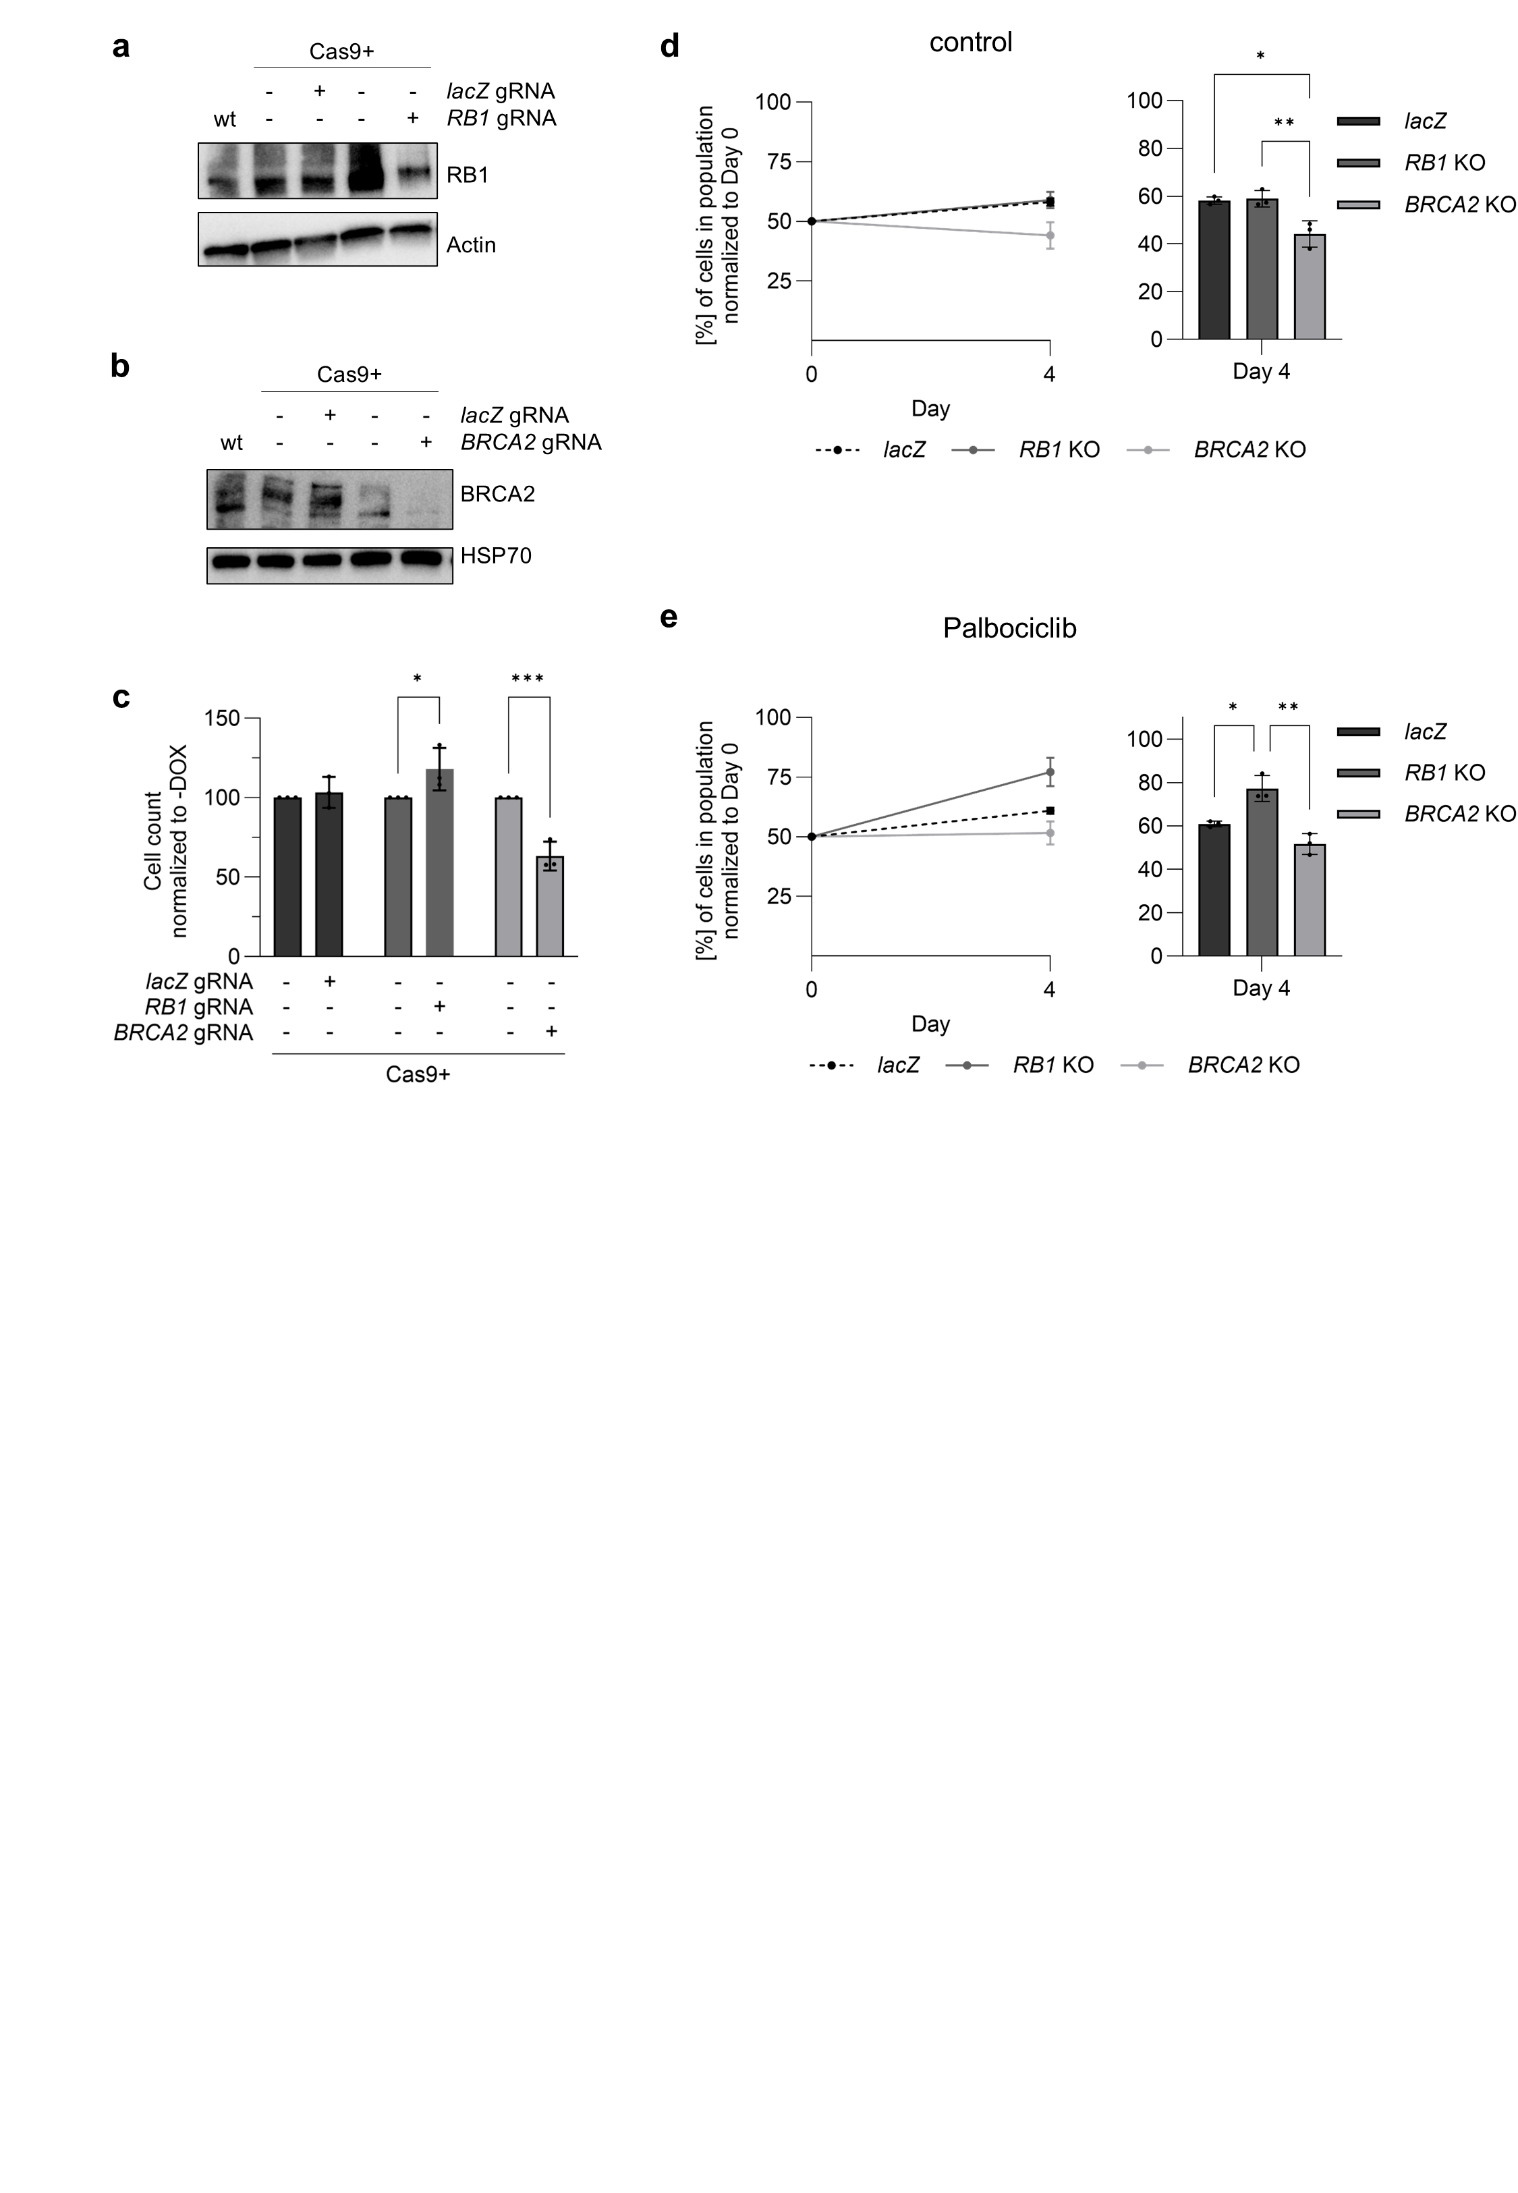


## **Fig. S1: Generation and characterization of RB1 and BRCA2 single-and co-mutated T47D cells.**

Immunoblot of T47D cells expressing gRNAs targeting *RB1* (**a**) or *BRCA2* (**b**). **c**: Cell counting experiment (Suppl. Materials and Methods) of T47D *lacZ*, *RB1* KO and *BRCA2* KO bulk population after 6 days of gRNA expression. Data represent mean ± SD, n=3, Ordinary 2-way ANOVA, Šídák’s multiple comparisons test. **d**: Left Panel: T47D *RB1* or *BRCA2* KO were mixed with T47D wild-type cells on day 0 at a ratio of 50:50. Changes in ratio of KO vs. wild-type cells were measured on day 4 and day 7 using flow cytometry (Supplementary Materials and Methods). Data represent mean ± SD. Right panel: statistical analysis. Data represent mean ± SD, Ordinary one-way ANOVA, Šídák’s multiple comparisons test. **e**: Left Panel: T47D *RB1* or *BRCA2* KO were mixed with T47D wild-type cells on day 0 at a ratio of 50:50 and treated with palbociclib (250nM) on day 1. Changes in ratio of KO vs. wild-type cells were measured on day 4 and day 7 using flow cytometry (Supplementary Materials and Methods). Data represent mean ± SD. Right panel: statistical analysis. Data represent mean ± SD, Ordinary one-way ANOVA, Šídák’s multiple comparisons test.


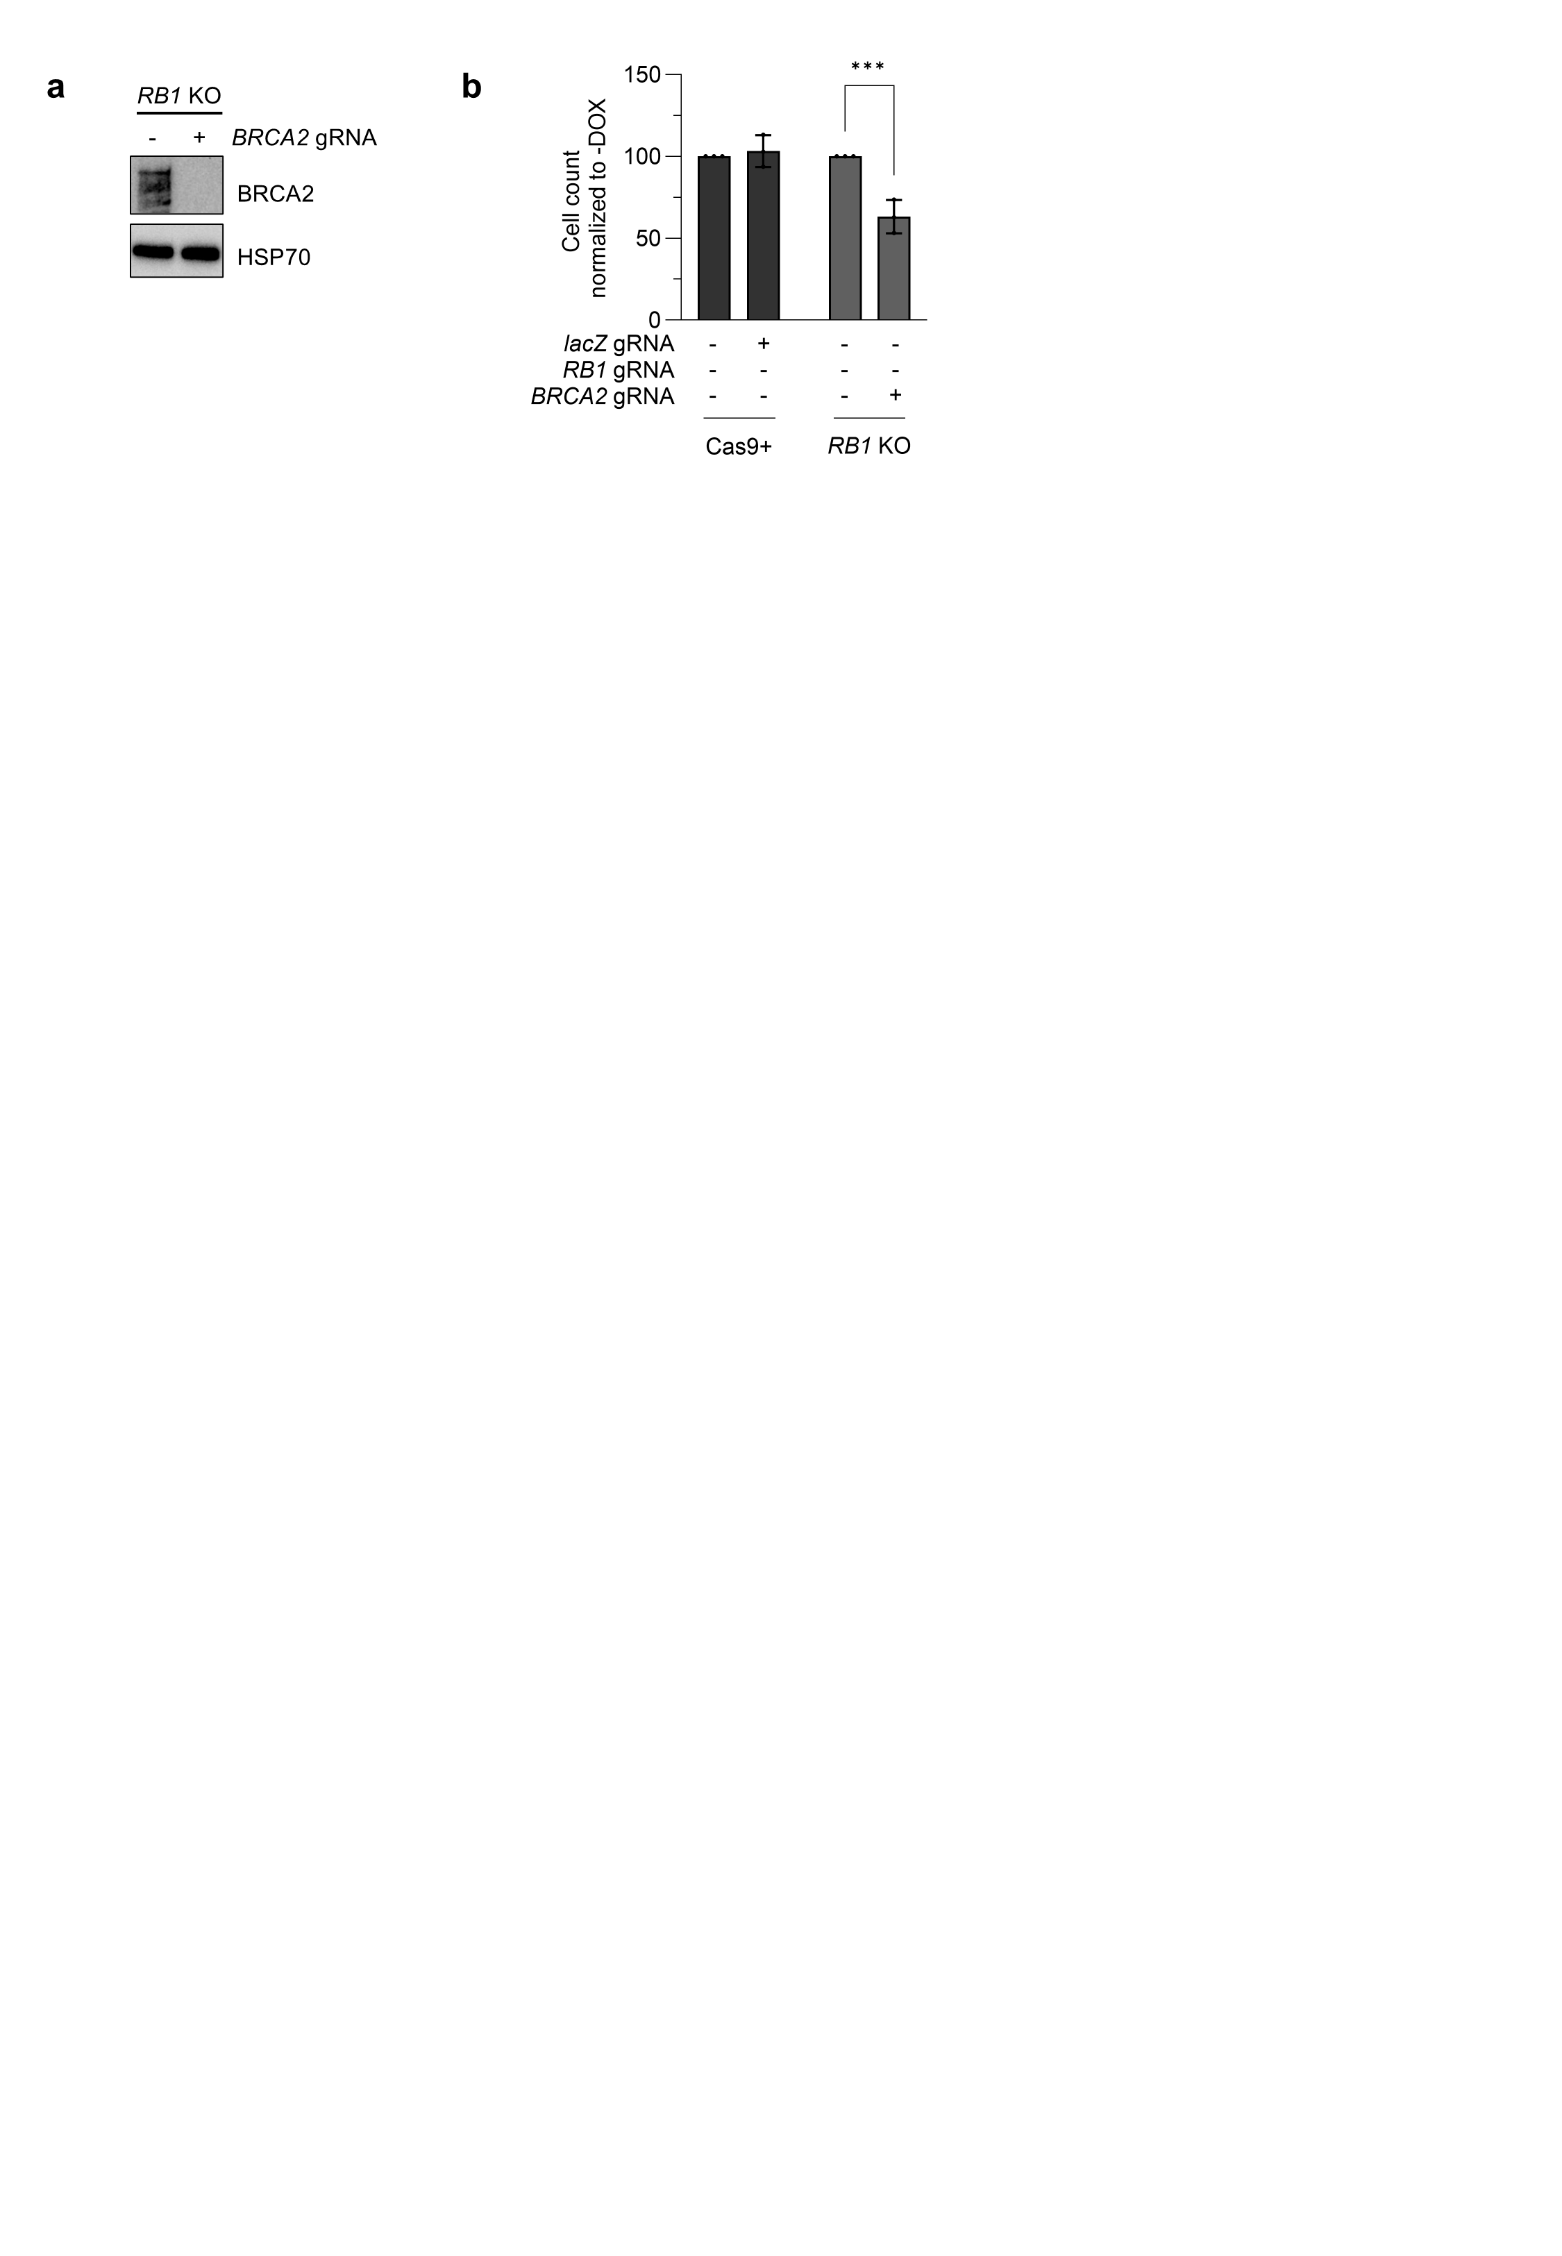


## **Fig. S2: *RB1*/*BRCA2* double knockout in T47D cells leads to reduced cell growth.**

**a**: Immunoblot for determining BRCA2 protein levels in T47D *RB1* KO cells. **b**: Cell counting experiment of T47D *lacZ*, *RB1* single-KO and *RB1*+*BRCA2* KO. Data represent mean ± SD, n=3, Ordinary 2-way ANOVA, Šídák’s multiple comparisons test.


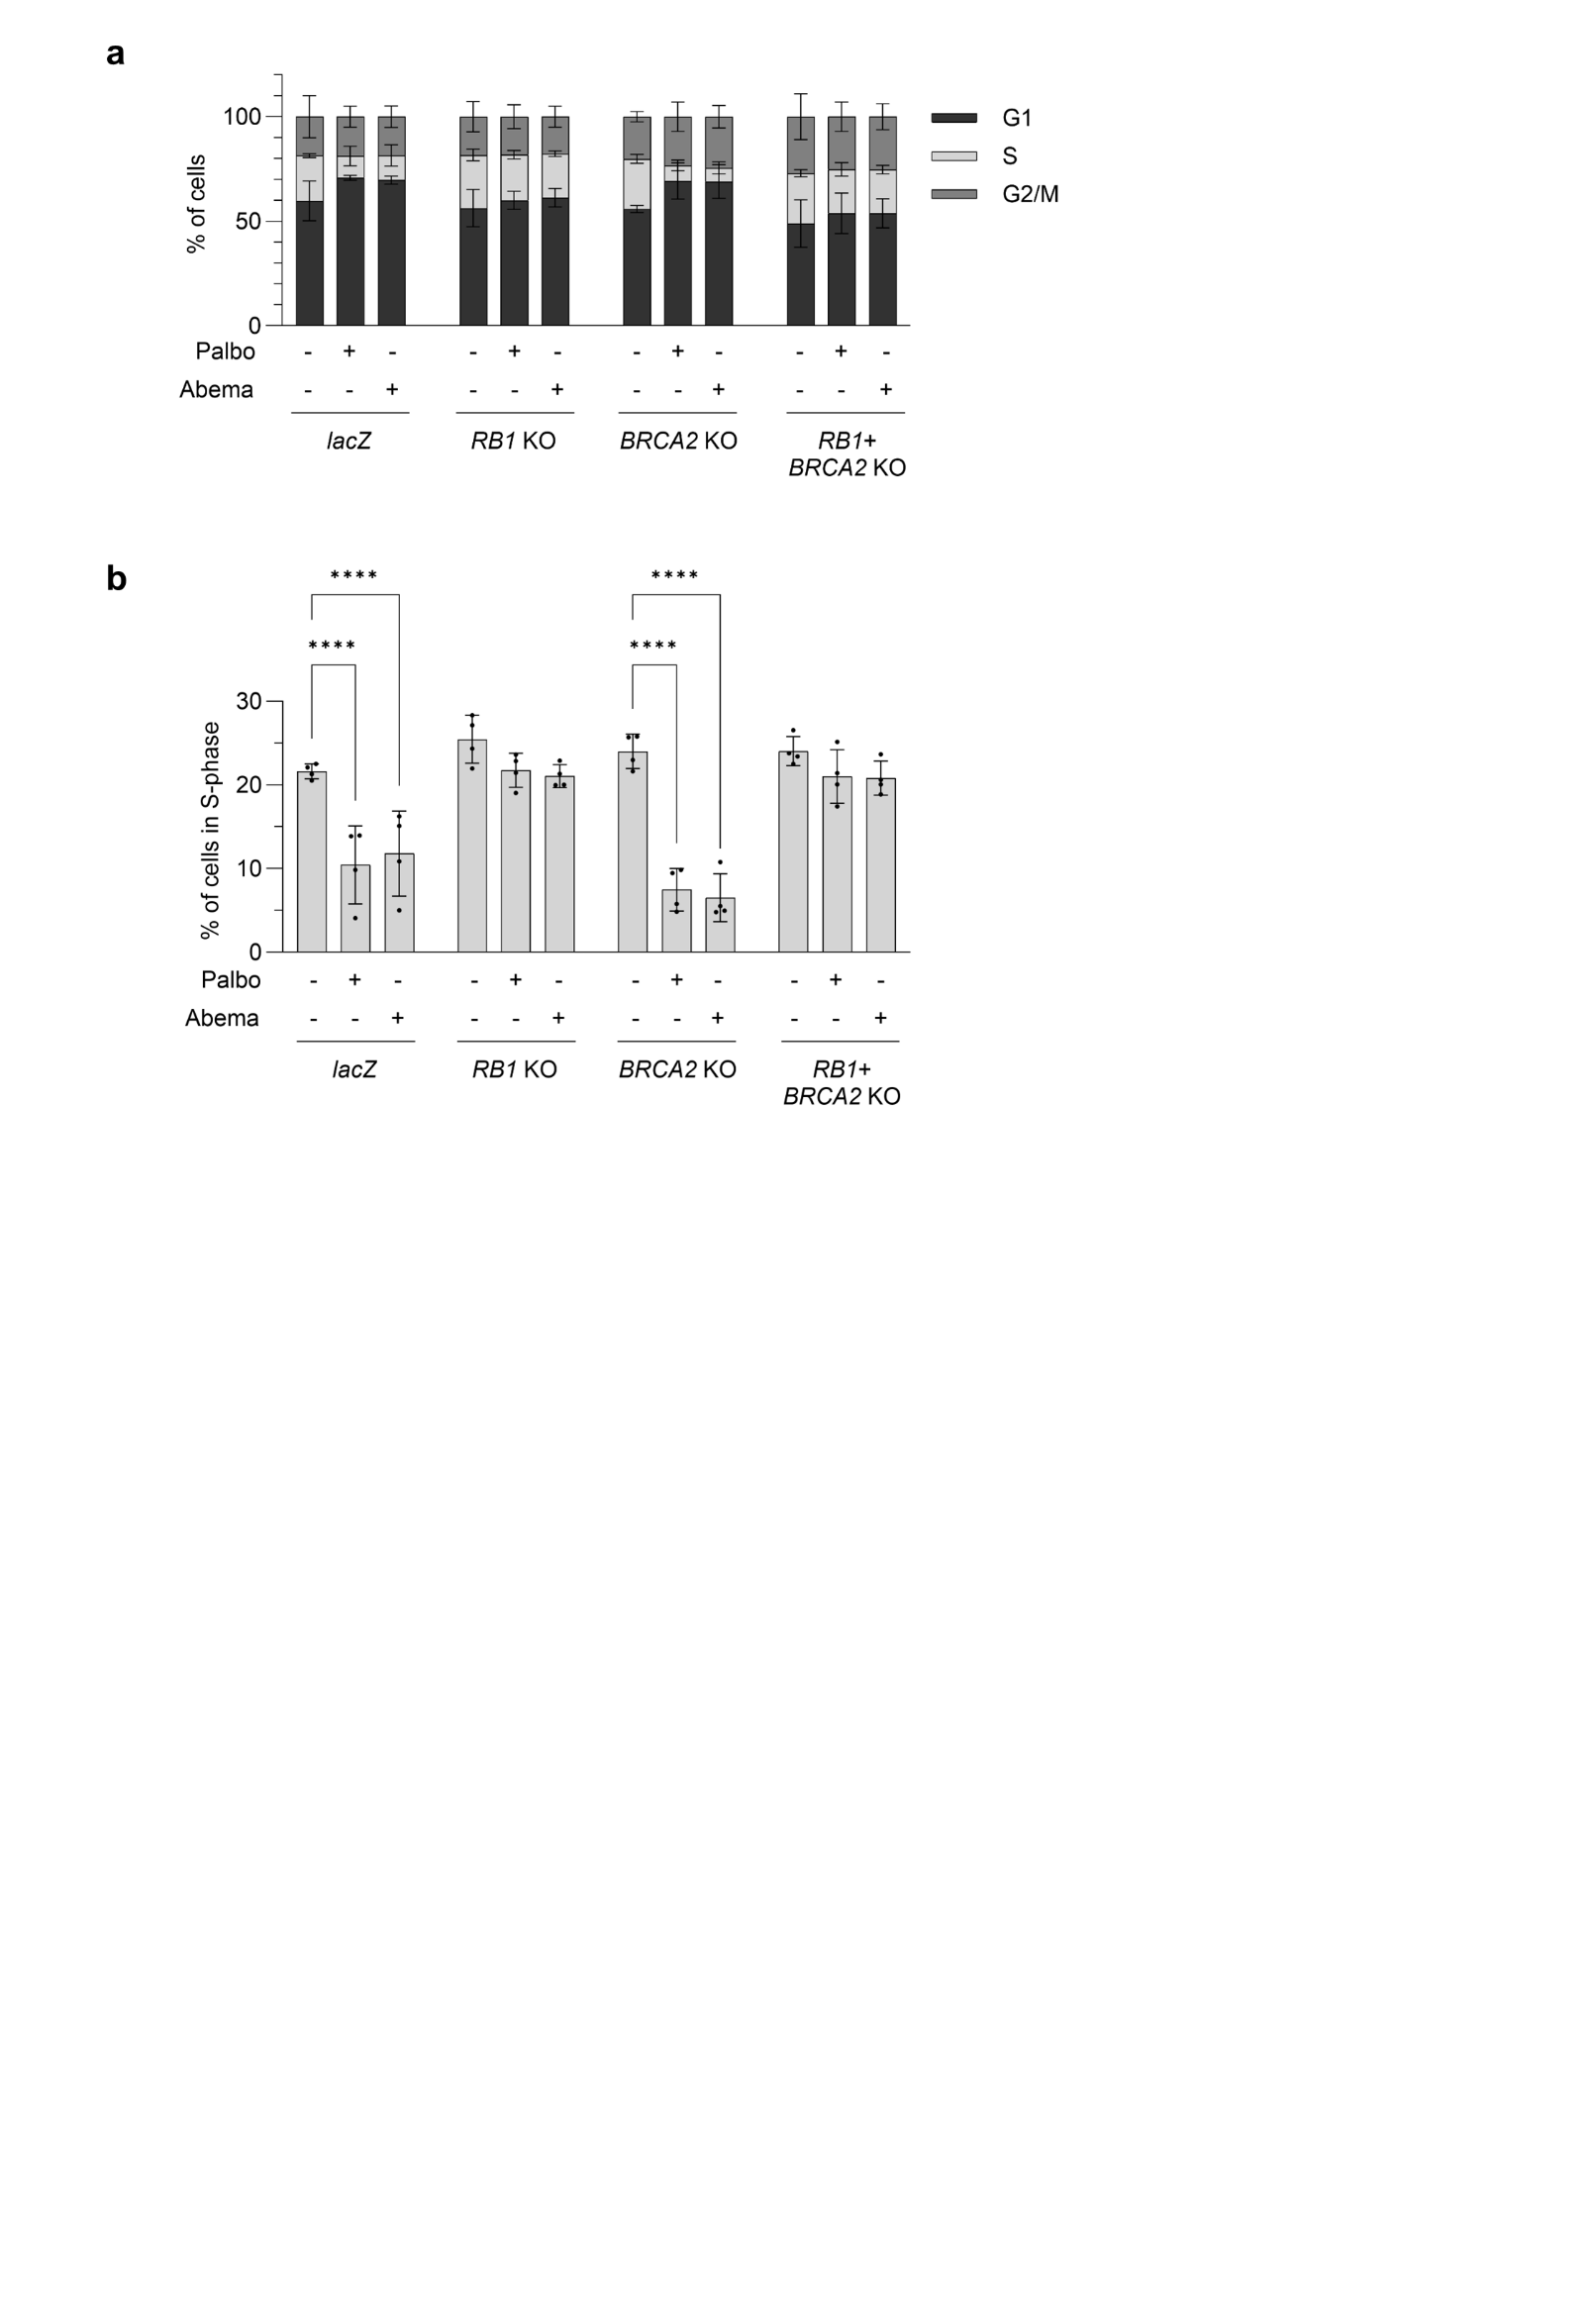


## **Fig. S3: Effect of *RB1*/*BRCA2* single- and double-KO on CDK4/6i response in T47D cells.**

**a**: Cell cycle analysis of T47D cells harboring *lacZ*, *RB1* KO, *BRCA2* KO or double-KO mutation in the presence and absence of the CDK4/6i palbociclib (250nM, 72h) or abemaciclib (250nM, 72h). Data represent mean ± SD, n=4. **b**: Analysis of changes in the percentage of T47D cells in S-Phase of (a). Data represent mean ± SD, Ordinary 2-way ANOVA, Šídák’s multiple comparisons test.


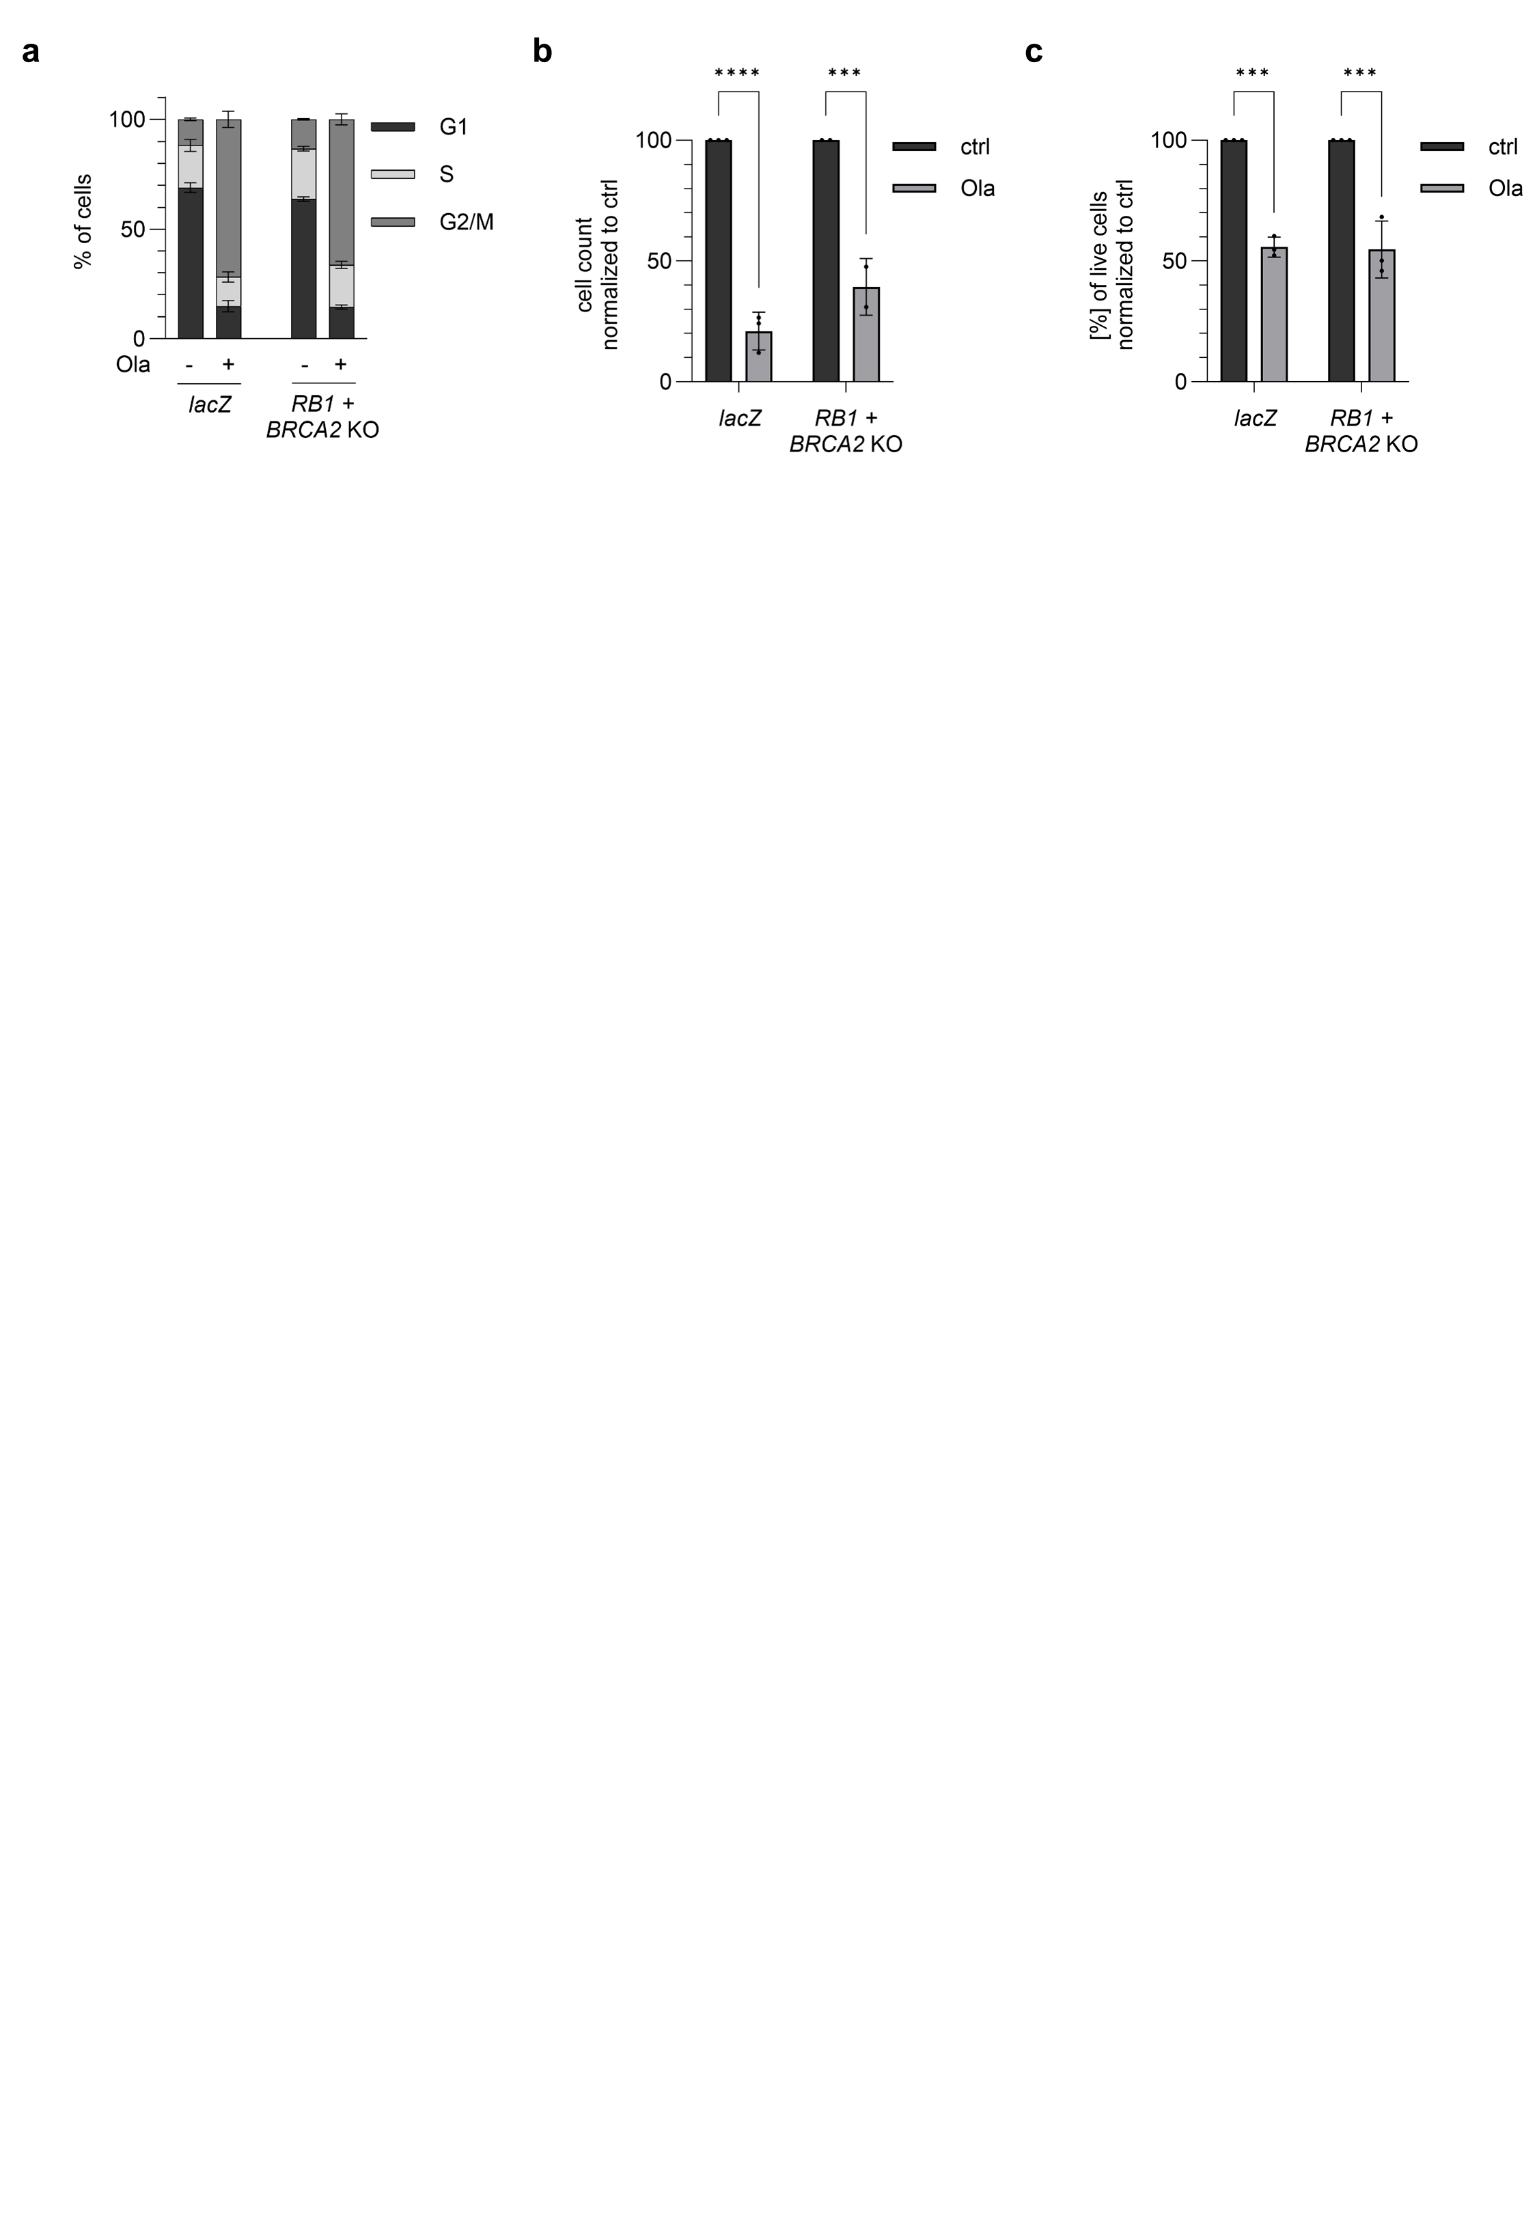


## **Fig. S4: Olaparib is effective in *RB1*-deficient CDK4/6i resistant T47D cells.**

**a**: Cell cycle analysis of T47D *lacZ* and *RB1*/*BRCA2* double KOs after treatment with olaparib (10µM, 96h). Data represent mean ± SD, n=3. **b**: Cell counting experiment of T47D *lacZ* and *RB1 + BRCA2* KO cells after 96h of olaparib treatment (10µM). Data represent mean ± SD, n=3 for *lacZ*, n=2 for *RB1* + *BRCA2* KO, Ordinary 2-way ANOVA, Šídák’s multiple comparisons test. **c**: Percentage of live T47D cells after 96h of olaparib treatment (10µM). Data represent mean ± SD, n=3, Ordinary 2-way ANOVA, Šídák’s multiple comparisons test.


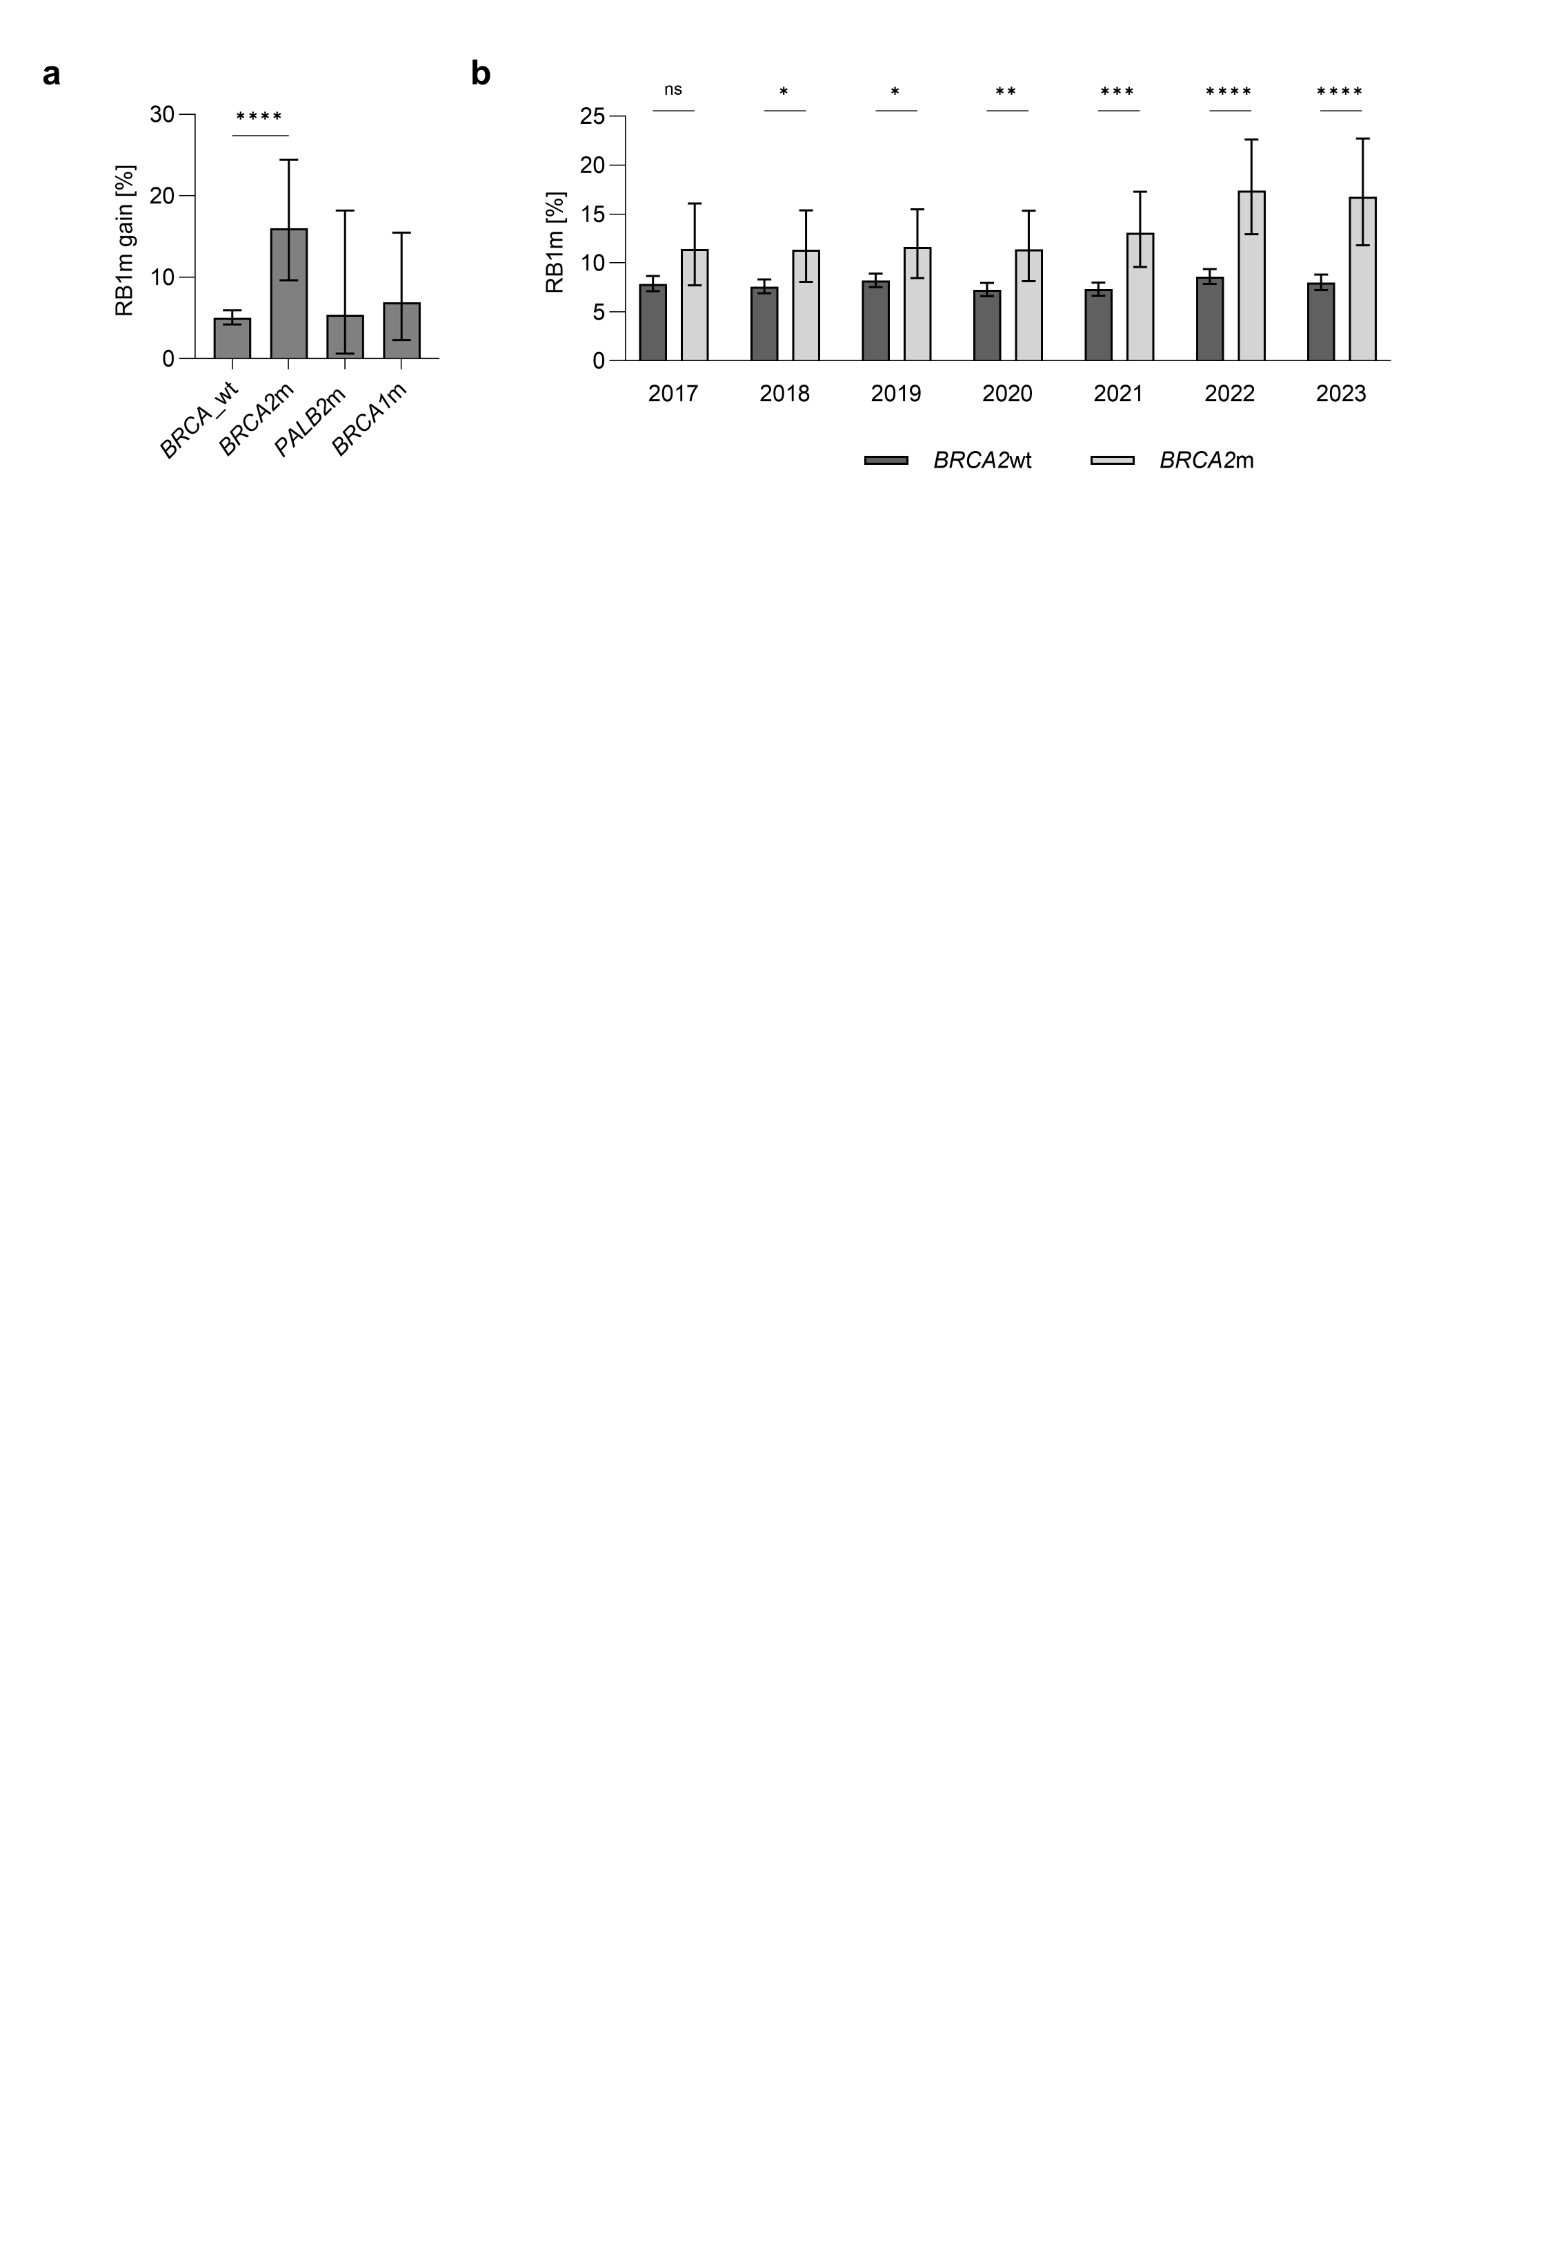


## **Fig. S5: *RB1*m frequency correlates with mutations in HRD-associated genes.**

**a**: Gain of *RB1* mutations in paired samples with existing mutations in HRD-associated genes. **b**: Analysis of the frequency of *BRCA2* and *RB1* co-alteration in years 2017-2023. Data in a) and b) represents mean and 95% CI.

# **Supplementary Materials and Methods:**

## **Cell counting**

Detached cells were harvested and collected in fresh medium. Cells were either directly counted or centrifuged (1500 rpm, 5 minutes, RT) and resuspended in 1 ml of PBS (PAN-Biotech). 10 µl of the suspension were mixed 1:1 with trypan blue and manually counted twice using the Neubauer Counting Chamber or using the TC20 Automated Cell Counter (Bio-Rad).

## **Competition Assays**

To mimic intra-tumoral heterogeneity, fluorescent *lacZ* (non-targeting control), *RB1 KO*, *BRCA2* KO or double-KO cells were counted and plated at a 1:1 ratio with non-fluorescent wild-type cells. To determine the exact seeding ratio, cells were measured using flow cytometry on day zero and normalized to 50%. Cells were then treated on day one and harvested for measurement on day four. The remaining cells were seeded and treated again and cultured until day seven for the second measurement. Data were analyzed using CytExpert 2.6.
